# Supplementary material
Source: publisher site journal article supplement (https://www.dovepress.com/get_supplementary_file.php?f=490227.docx)
Supplement: Supplementary file 1 [file get_supplementary_file.php]

**Supplementary Table 1. ICD-9 and ICD-10 codes for COPD**

| **ICD-9** | **ICD-10** | **Description** |
| --- | --- | --- |
| 491.0 | J41.0 | Simple chronic bronchitis |
| 491.1 | J41.1 | Mucopurulent chronic bronchitis |
| 491.8 | J41.8 | Mixed simple and mucopurulent chronic bronchitis |
| J44.8 | Other specified chronic obstructive pulmonary disease |
| 491.9 | J42 | Unspecified chronic bronchitis |
| 491.20 | – | Chronic obstructive bronchitis without acute exacerbation |
| 491.21 | J44.1 | Chronic obstructive pulmonary disease with acute exacerbation, unspecified |
| 491.22 | J44.0 | Chronic obstructive pulmonary disease with acute lower respiratory infection |
| 492.X | J43.0 | MacLeod syndrome |
| J43.1 | Panlobular emphysema |
| J43.2 | Centrilobular emphysema |
| J43.8 | Other emphysema |
| J43.9 | Emphysema, unspecified |
| 496 | J44.9 | Chronic obstructive pulmonary disease, unspecified |
